# Supplementary material for: An optimized bioluminescent assay for inorganic sulfate quantitation in freshwater
Source: Royal Society of Chemistry journal article supplement (doi:10.1039/c3ay26255c), 2013-01-01
Supplement: c3ay26255c.pdf [file c3ay26255c.pdf]

## **An optimized bioluminescent assay for inorganic sulfate quantitation in freshwater**

**Simone M. Marques, Joaquim C.G. Esteves da Silva\***

Centro de Investigação em Química da Universidade do Porto (CIQ-UP), *Department of Chemistry and Biochemistry, Faculty of Sciences, University of Porto, Rua do Campo Alegre, no. 687, 4169-007 Porto, Portugal.*

*E-mail: jcsilva@fc.up.pt; Fax: +351 220 402 659; Tel: +351 220 402 569*

**Supplemental information**

**Table S1** Center, COSCIND<sup>a</sup> and HOIE<sup>b</sup> significance testing methods results for the screening designs

|                                                       | Fractional Factorial Design I         |         | Fractional Factorial Design II |         | Full Factorial Design |      |
|-------------------------------------------------------|---------------------------------------|---------|--------------------------------|---------|-----------------------|------|
|                                                       | Center                                | COSCIND | Center                         | COSCIND | Center                | HOIE |
|                                                       | ATP concentration / $\mu\text{M}$ (A) | +       | NS                             |         |                       | NS   |
| ATP sulfurylase <sup>c</sup> concentration / nM (B)   | NS                                    | NS      | -                              | 5%      | NS                    | NS   |
| Inorganic pyrophosphatase concentration / nM          | NS                                    | NS      | NS                             | NS      |                       |      |
| Incubation time / minutes                             | NS                                    | NS      | NS                             | NS      |                       |      |
| Temperature of incubation / °C                        | NS                                    | NS      | NS                             | NS      |                       |      |
| Firefly luciferase concentration / nM (C)             | +                                     | NS      |                                |         | NS                    | ++   |
| Firefly D-luciferin concentration / $\mu\text{M}$ (D) | +                                     | NS      |                                |         | NS                    | ++   |
| AB                                                    |                                       |         |                                |         | NS                    | NS   |
| AC                                                    |                                       |         |                                |         | NS                    | +    |
| AD                                                    |                                       |         |                                |         | NS                    | NS   |
| BC                                                    |                                       |         |                                |         | NS                    | NS   |
| BD                                                    |                                       |         |                                |         | NS                    | NS   |
| CD                                                    |                                       |         |                                |         | NS                    | NS   |

<sup>a</sup>COSCIND, Comparison with a Scale-Independent Distribution

<sup>b</sup>HOIE, Higher Order Interaction Effects

<sup>c</sup> ATP sulfurylase, adenosine-5'-triphosphate sulfurylase

Significance of each effect at 95% level: NS, not significant; from + to +++, positive effect; from - to - - -, negative effect

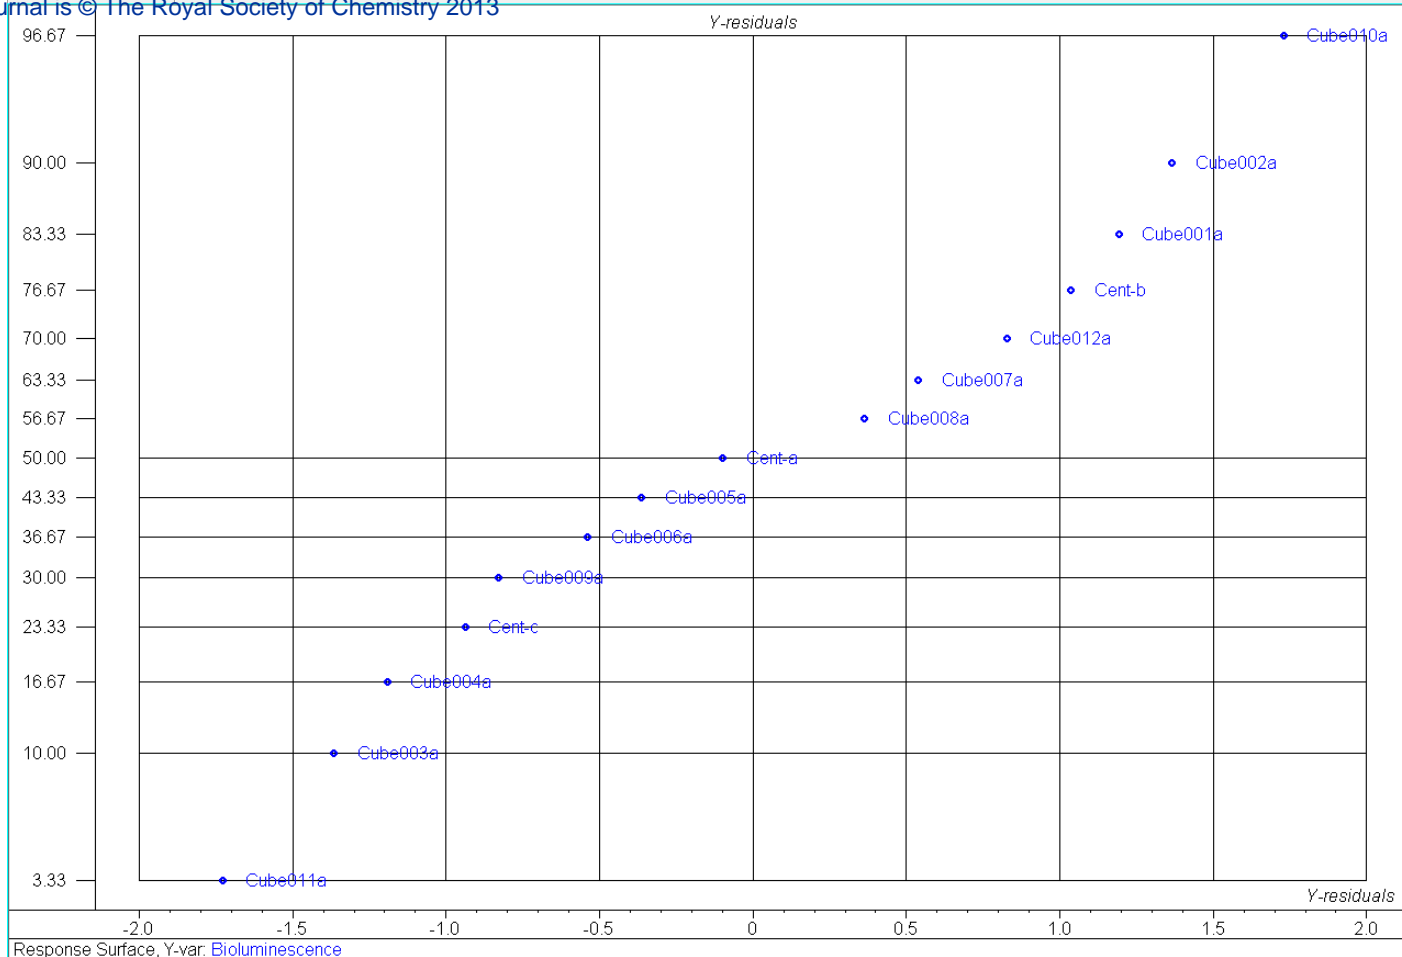

**Fig. S1.** Normal probability plot of the residuals of the Box Behken optimization design.
